# Supplementary material for: Active mRNA degradation by EXD2 nuclease elicits recovery of transcription after genotoxic stress
Source: PubMed Central journal article supplement (PMC9859823; doi:10.1038/s41467-023-35922-5), 2023-01-20
Supplement: 41467_2023_35922_MOESM1_ESM.pdf [file 41467_2023_35922_MOESM1_ESM.pdf]

**a.**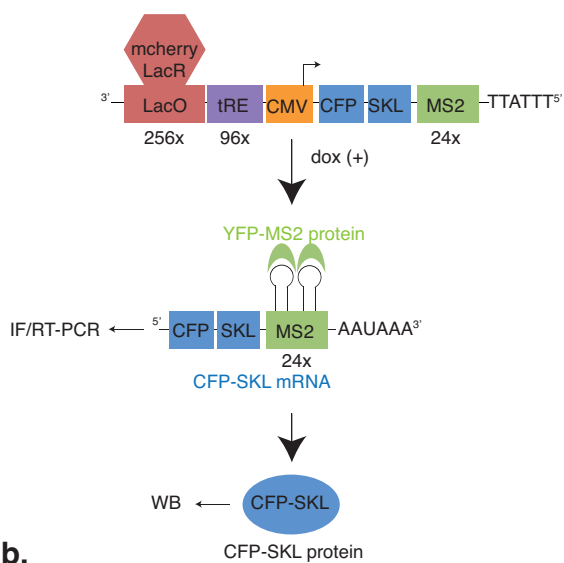**b.**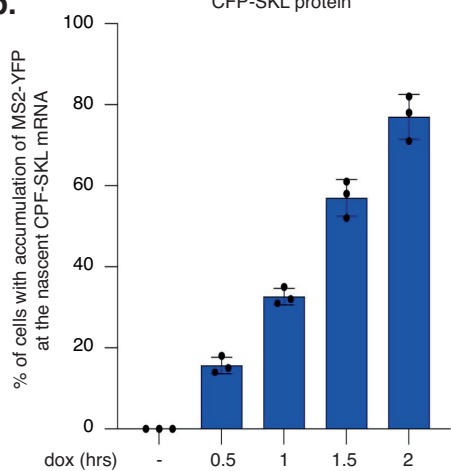**c.**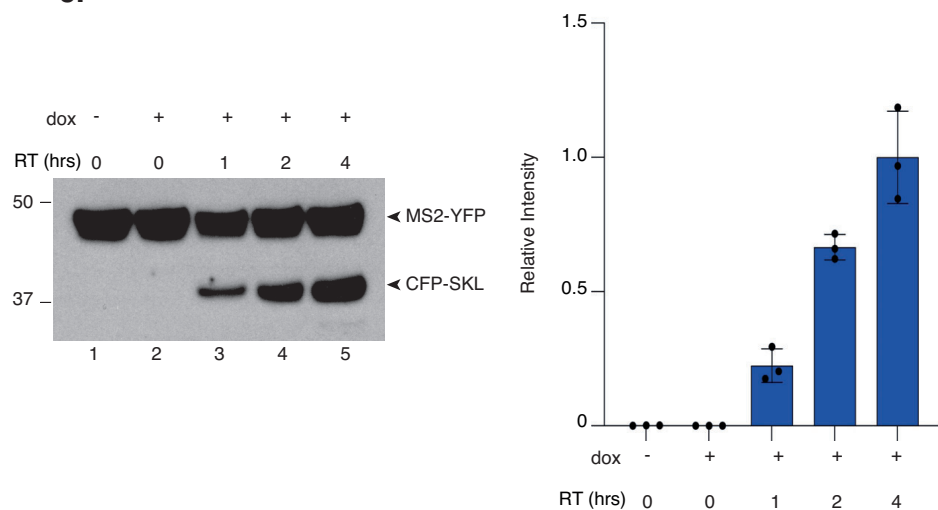**d.**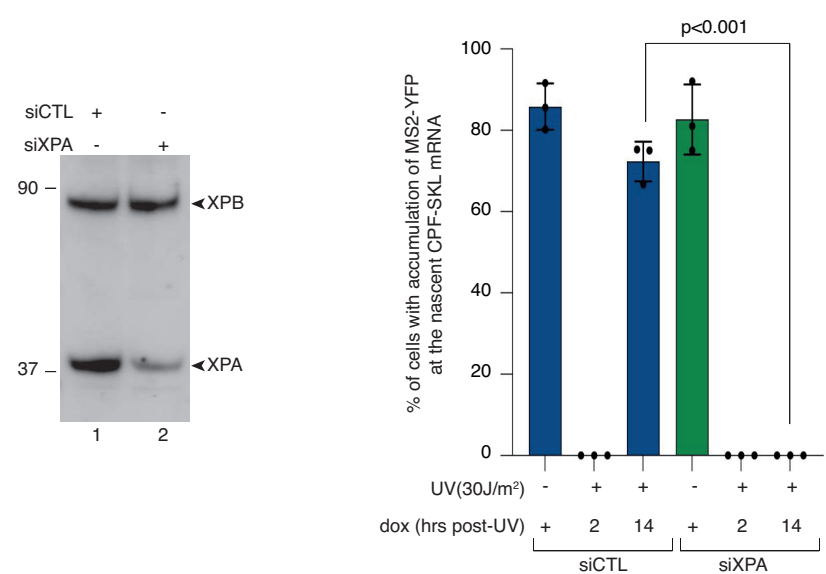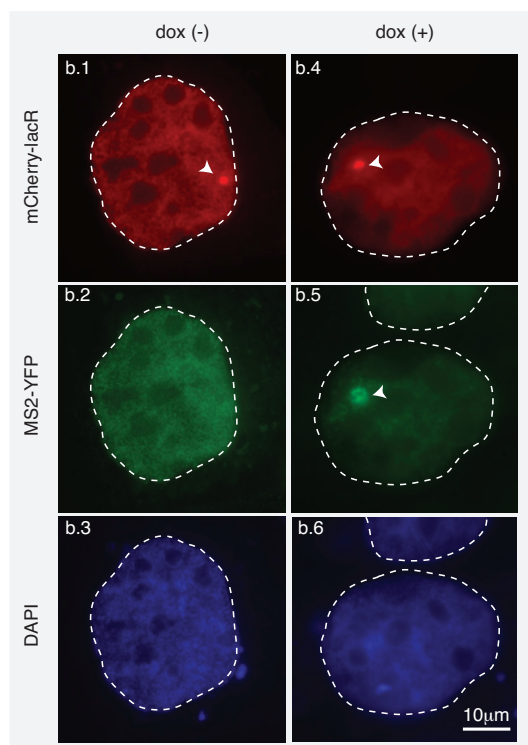**e.**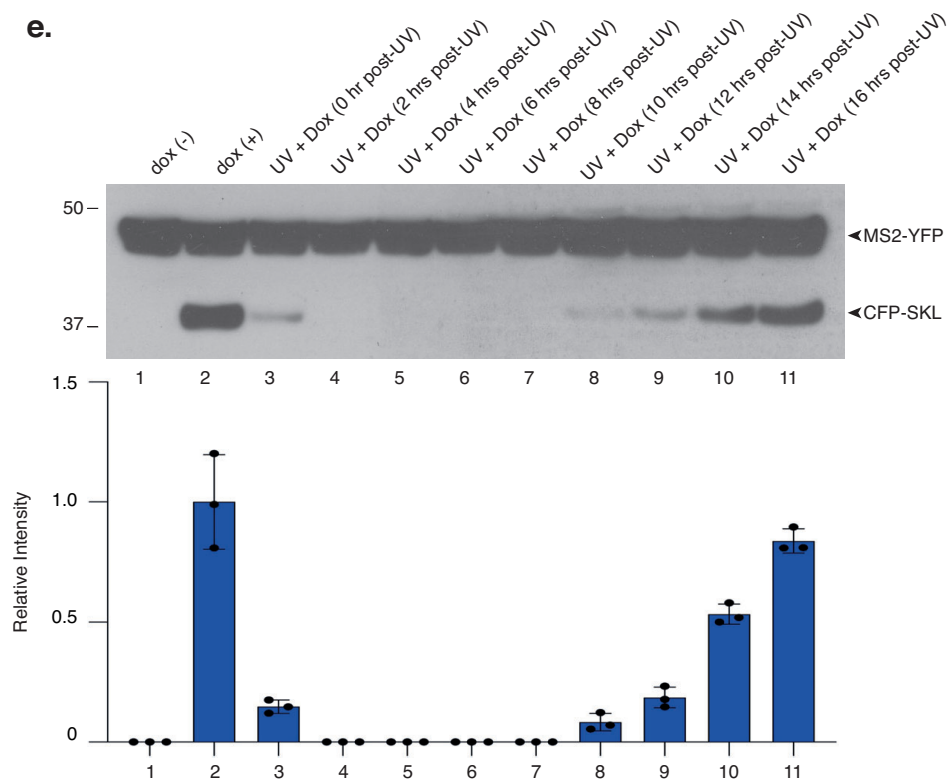

### Supplementary Figure 1: The CFP-SKL reporter assay

**a.** 256 copies of lacO array provide examination of the reporter through a mCherry protein fused to lacR. Tetracycline response elements (TREs) control expression of the unique *CFP-SKL* mRNA transcript upon dox treatment. *CFP-SKL* transcription is detected through the binding of YFP-MS2 and encoded CFP-SKL protein that can be detected by WB.

**b.** U-2 OS were treated with dox as indicated and *CFP-SKL* mRNA expression was quantified. Results are expressed as % of cells showing YFP-MS2 accumulation at a single locus (n= 3x20 cells, biological triplicates). Bars represent mean values of three different experiments (Biological triplicates) (+/- SD). Representative confocal images of MS2-YFP accumulation at *CFP-SKL* is shown. The reporter locus is detected with a mCherry-LacR fusion construct.

**c.** Immuno-blot for CFP-SKL and YFP-MS2 in U-2 OS cells treated with dox and subsequently let to recover in dox-free medium. Extracts were immuno-blotted with anti-GFP. CFP-SKL signals were normalized with YFP-MS2 signals (+/-SEM). Three independent immunoblots were performed (technical triplicates). Source data are provided as a Source Data file.

**d.** U-2 OS cells were transfected with siCTL or siXPA for 24 hours and with a construct expressing mCherry-lacR for 24 hours before UV irradiation (30J/m<sup>2</sup>) and subsequent 2-hour pulse-incubation with dox. **Left panel;** cell extracts were immunoblotted against XPB and XPA. **Right panel;** Newly transcribed *CFP-SKL* were detected at the reporter locus. Quantification of the transcribing locus was done and results are expressed as % of cells showing YFP-MS2 accumulation at a single locus (n= 3x20 cells, biological triplicates). Bars represent mean values of three different experiments (Biological triplicates) (+/- SD). One-way ANOVA with post-hoc Tukey adjustment comparisons were used to determine the p-values. Source data are provided as a Source Data file.

**e.** U-2 OS cells were UV-irradiated (30 J/m<sup>2</sup>) and pulse-incubated for 2 hours with dox. Cells were allowed to recover for 4 hours in the absence of dox. Extracts were immuno-blotted with anti-GFP antibody. Lane 1; cells were not treated with dox. Lane 2; cells were treated with dox for 2 hours before to recover 4 hours in the absence of dox. CFP-SKL signals were normalized

with YFP-MS2 signals ( $\pm$ -SEM). Three independent immunoblots were performed (technical triplicates). Source data are provided as a Source Data file.

**a.**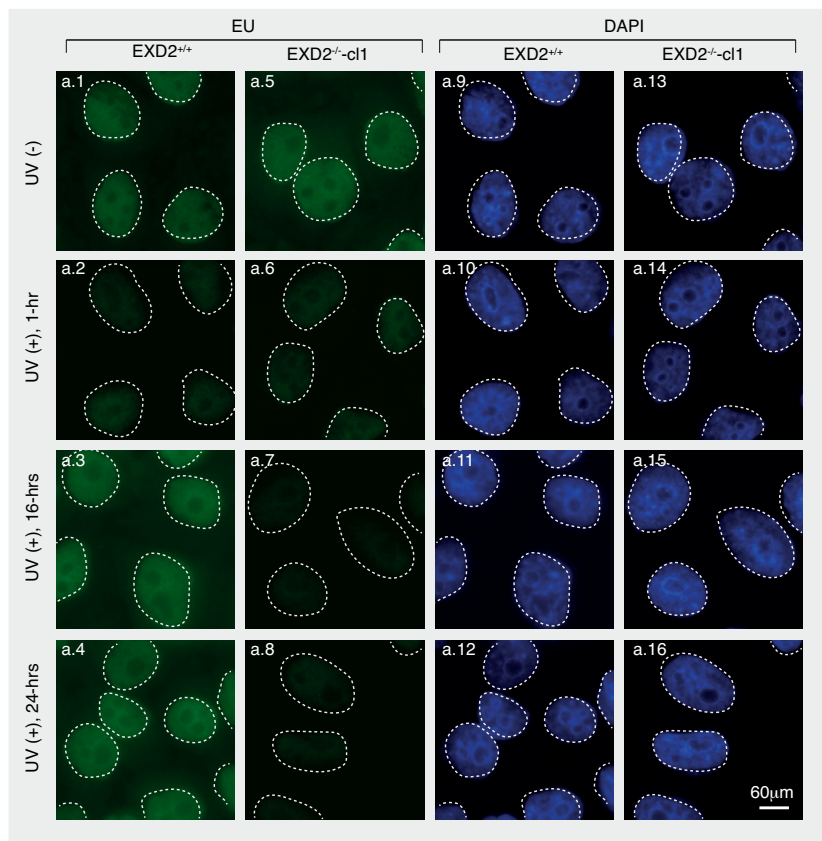**b.**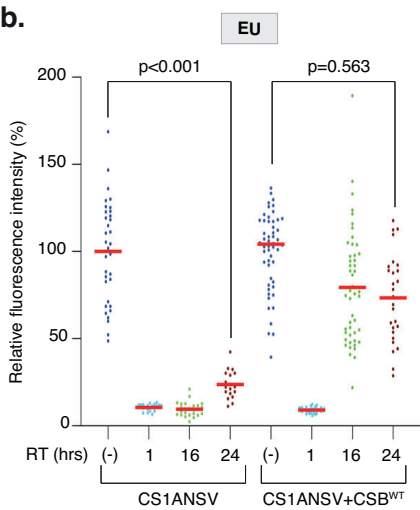**e.**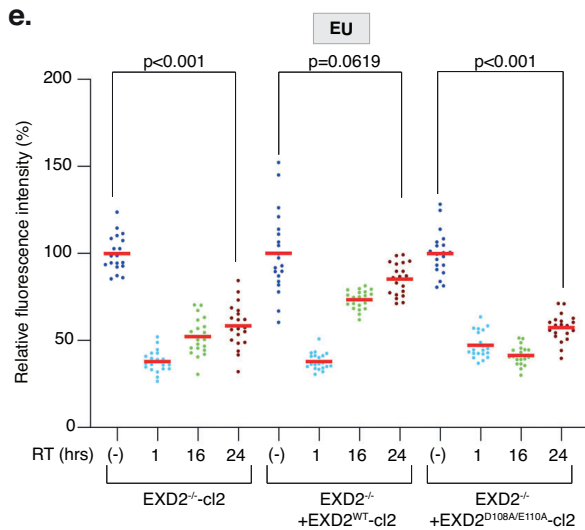**f.**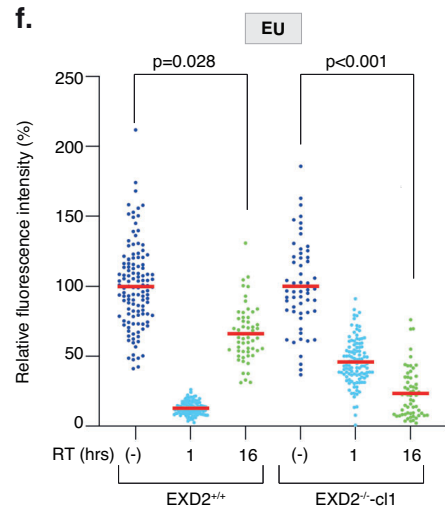**c.**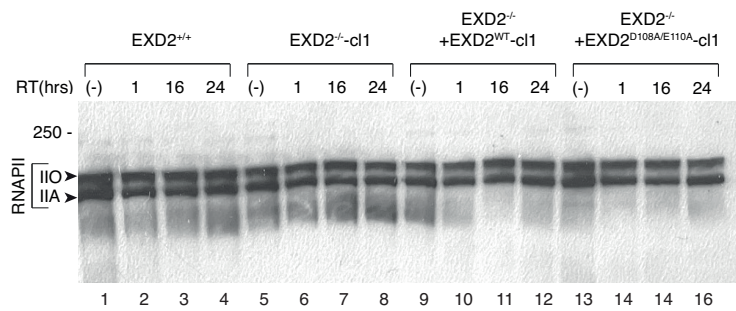**d.**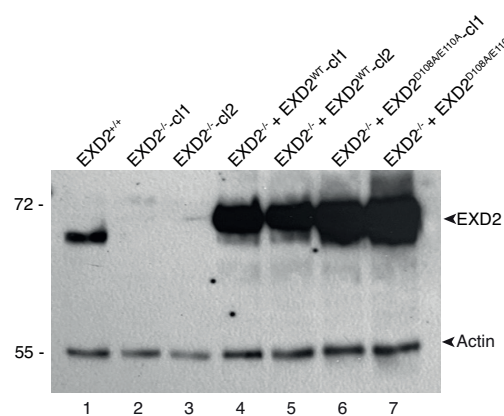

## Supplementary Figure 2: Lack of EXD2 induces inhibition of RRS

**a.** Representative confocal images of EXD2<sup>+/+</sup> and EXD2<sup>-/-</sup>-cl1. Cells were mock or UV-irradiated (15J/m<sup>2</sup>) and mRNA was labelled with EU 1, 16 and 24 hours after UV-irradiation. Images of the cells were obtained with the same microscopy system and constant acquisition parameters.

**b.** CS1ANSV and CS1ANSV+CSB<sup>WT</sup> were UV-irradiated (15J/m<sup>2</sup>) and mRNA was labelled with EU at 1, 16 and 24 hours after UV-irradiation. EU signal was quantified by ImageJ and relative integrated density normalized to mock-treated level set to 100% are reported on the graph (n=at least 20 cells per condition). Red bars indicate mean integrated density. One-way ANOVA with post-hoc Tukey adjustment comparisons were used to determine the p-values. Source data are provided as a Source Data file.

**c.** HeLa were mock or UV-irradiated (15J/m<sup>2</sup>) and let to recover for the indicated times before lysis. Protein lysates were immuno-blotted for RPB1 subunit of RNAPII. Molecular mass of the proteins is indicated on the left (kDa). RT; recovery time. IIO, phosphorylated form of RPB1. IIA non-phosphorylated form. Source data are provided as a Source Data file.

**d.** Protein lysates were immuno-blotted for proteins as indicated. Molecular mass of the proteins is indicated (kDa). Source data are provided as a Source Data file.

**e.** HeLa cells were mock or UV-irradiated (15J/m<sup>2</sup>) and mRNA was labelled with EU 1, 16 and 24 hours after UV-irradiation. EU signal was quantified by ImageJ and relative integrated density normalized to mock-treated level set to 100% are reported on the graph (n=at least 20 cells per condition). Red bars indicate mean integrated density. One-way ANOVA with post-hoc Tukey adjustment comparisons were used to determine the p-values. Source data are provided as a Source Data file.

**f.** EXD2<sup>+/+</sup> and EXD2<sup>-/-</sup>-cl 1 cells were grown to 80% confluence and further incubated 24 hours in medium containing 0.5% FCS. Cells were mock or UV-irradiated (15J/m<sup>2</sup>) and mRNA was labelled with EU at 1 and 16 hours after UV-irradiation. EU signal was quantified by ImageJ and relative integrated density normalized to mock-treated level set to 100% are reported on the graph (n= at least 50 cells per condition). Red bars indicate mean integrated density. One-

way ANOVA with post-hoc Tukey adjustment comparisons were used to determine the p-values. Source data are provided as a Source Data file.

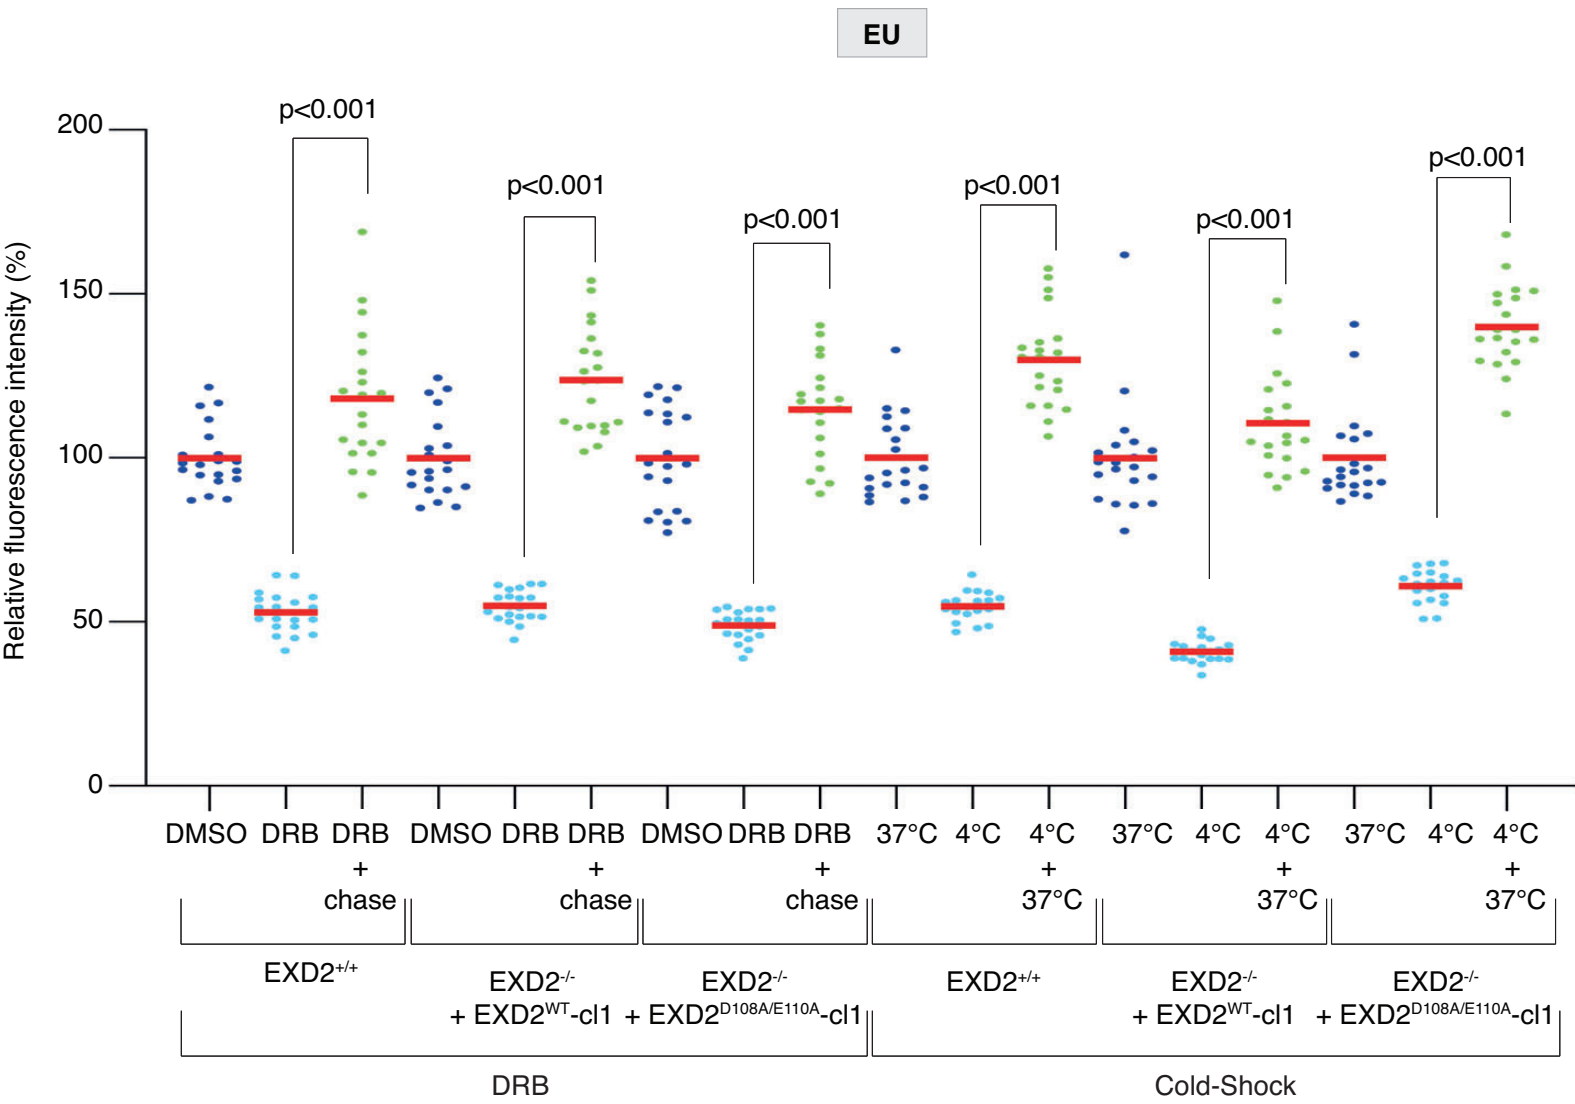

**Supplementary Figure 3: EXD2 is not involved in RRS after DRB or cold-shock treatment**

**DRB:** EXD2<sup>+/+</sup>, EXD2<sup>-/-</sup> + EXD2<sup>WT</sup>-cl1 and EXD2<sup>-/-</sup> + EXD2<sup>D108A/E110A</sup>-cl1 were treated with DRB (100 μM) for 1 hour before chase and cells were let to recover for 30 minutes. mRNA was labelled with EU before (DMSO), during (DRB) or after the chase (DRB + chase) of DRB treatment. **Cold-Shock:** EXD2<sup>+/+</sup>, EXD2<sup>-/-</sup> + EXD2<sup>WT</sup>-cl1 and EXD2<sup>-/-</sup> + EXD2<sup>D108A/E110A</sup>-cl1 were incubated at 4°C for 15 minutes and let to recover at 37°C for 30 minutes. mRNA was labelled with EU before (37°C), after 15 minutes at 4°C (4°C) or after the recovery at 37°C (4°C+37°C). For both experiments, EU signal was quantified by ImageJ and relative integrated densities normalized to mock-treated level set to 100% are reported on the graph (n= at least 20 cells per condition). Red bars indicate mean integrated density. One-way ANOVA with post-hoc Tukey adjustment comparisons were used to determine the p-values. Source data are provided as a Source Data file.





**Supplementary Figure 4: NER is not affected by the lack of EXD2**

EXD2<sup>+/+</sup> and EXD2<sup>-/-</sup>-cl1 were mock or UV-irradiated (15J/m<sup>2</sup>) and let to recover for the indicated times before lysis. Protein lysates were immuno-blotted for EXD2,  $\gamma$ H2AX or Vinculin. Molecular mass of the proteins is indicated (kDa). RT; recovery time. Source data are provided as a Source Data file.

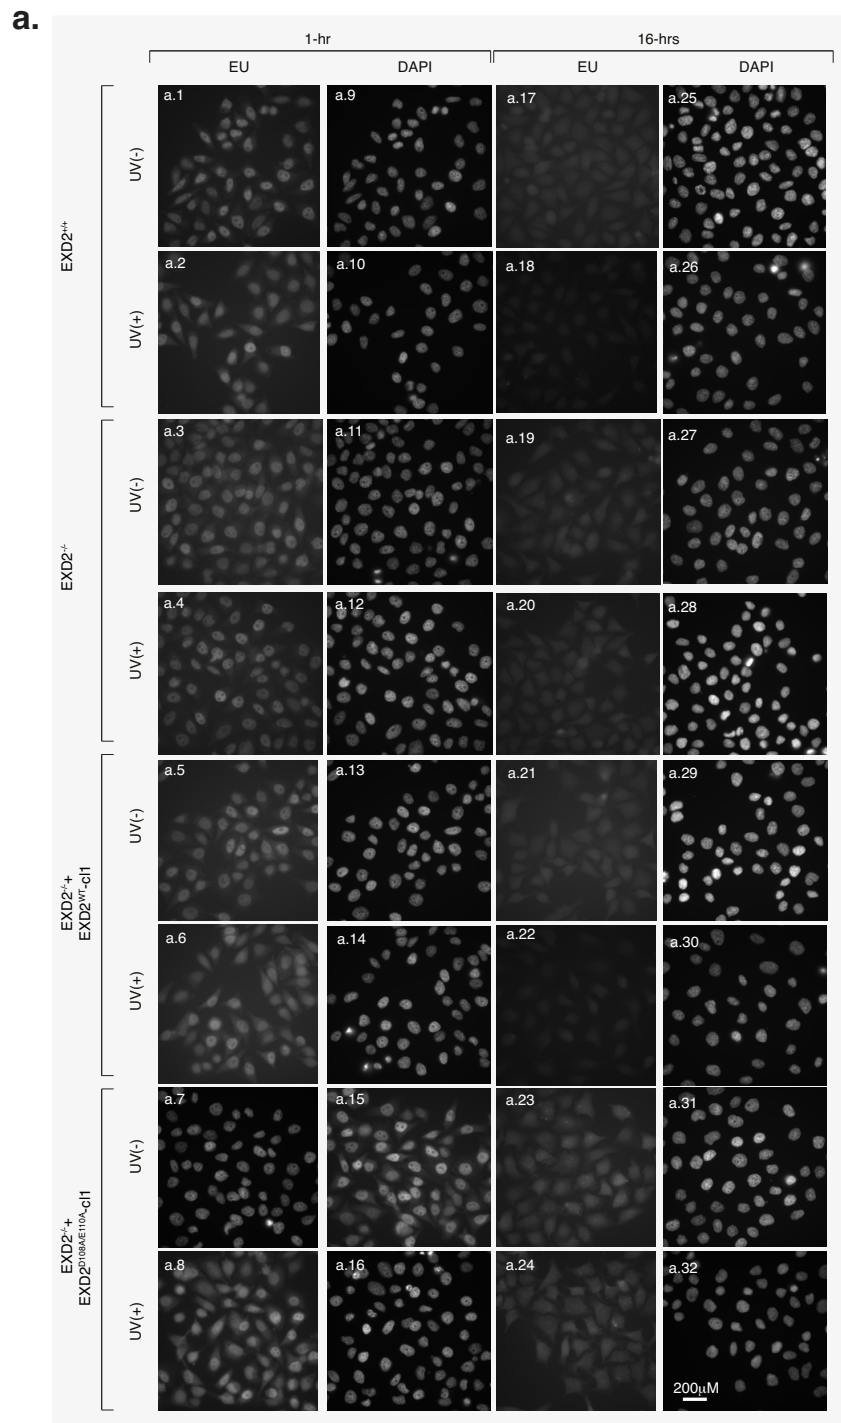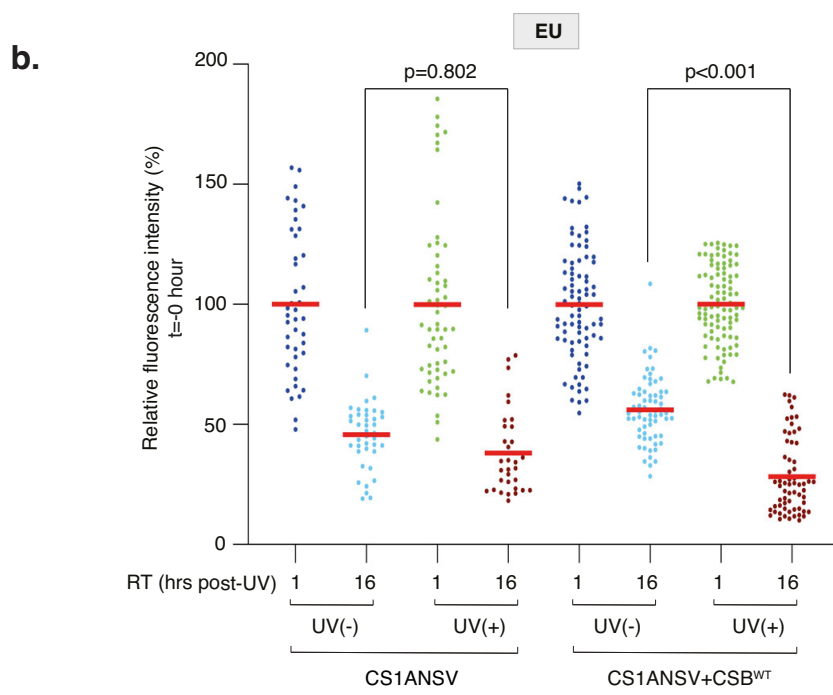

**Supplementary Figure 5: mRNAs under synthesis are degraded by EXD2 following UV irradiation**

**a.** Representative confocal images of EXD2<sup>+/+</sup>, EXD2<sup>-/-</sup>, EXD2<sup>-/-</sup> + EXD2<sup>WT</sup>-cl1 and EXD2<sup>-/-</sup> + EXD2<sup>D108A/E110A</sup>-cl1 showing newly synthesized mRNA (1 hour or 16 hours after mock-treatment or UV irradiation at 15J/m<sup>2</sup>). Images of the cells were obtained with the same microscopy system and constant acquisition parameters.

**b.** CS1ANSV and CS1ANSV+CSB<sup>WT</sup> were treated as indicated in Figure 4a, upper panel, and EU signals were quantified using ImageJ and normalized to the value obtained at 1 hour set to 100%. Values are reported on the graph (n= at least 50 cells). Red bars indicate mean integrated density. *RT*; recovery time. One-way ANOVA with post-hoc Tukey adjustment comparisons were used to determine the p-values. Source data are provided as a Source Data file.

**a.**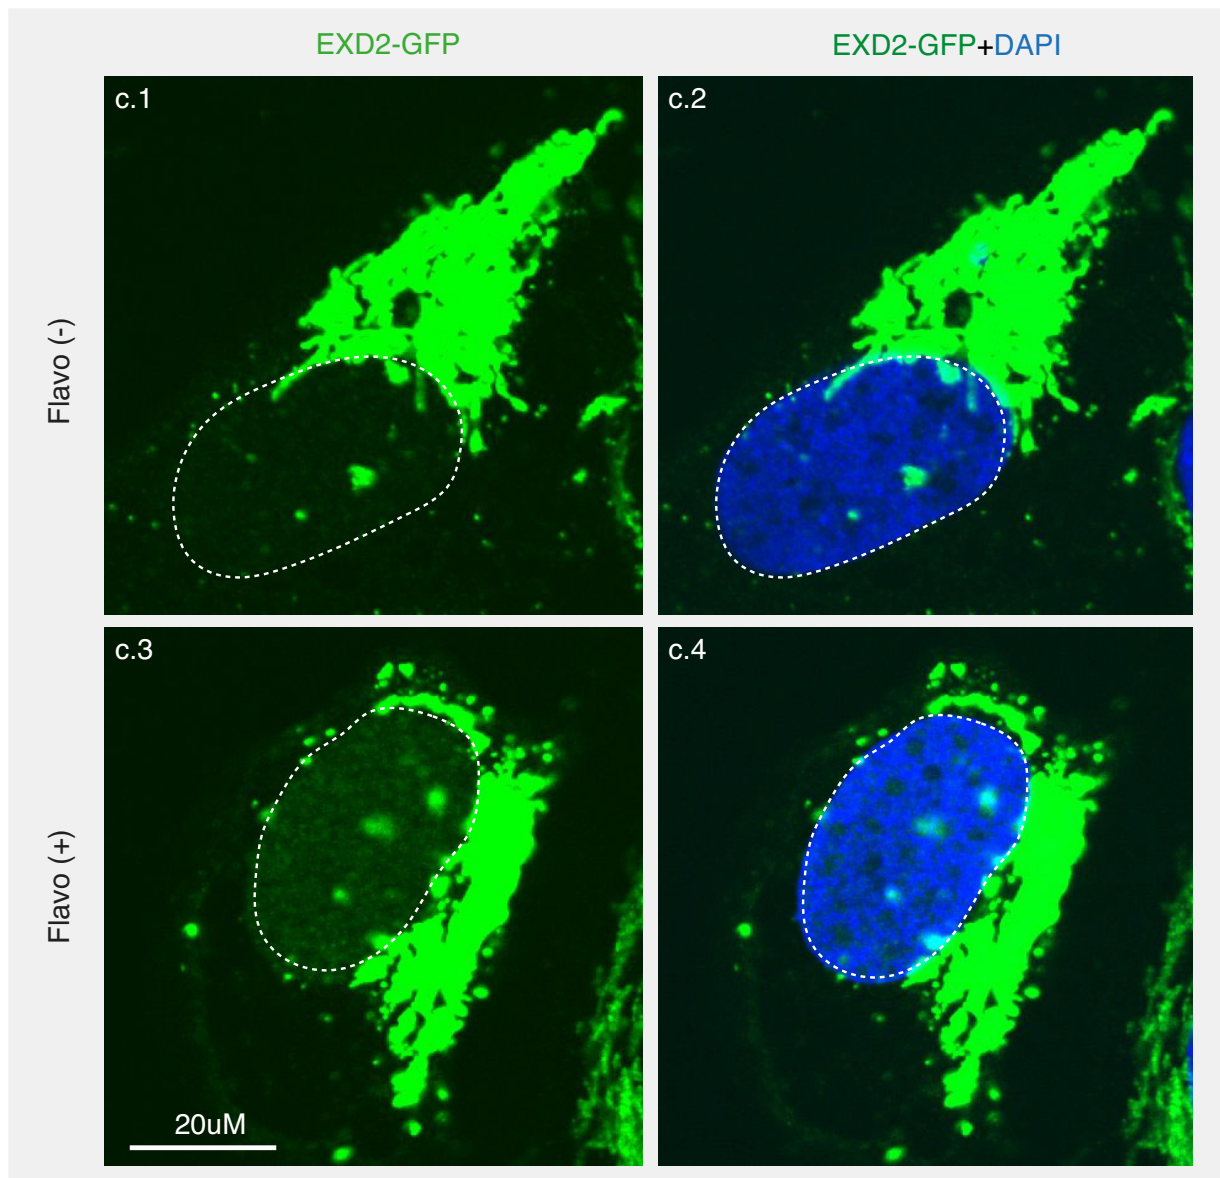**b.**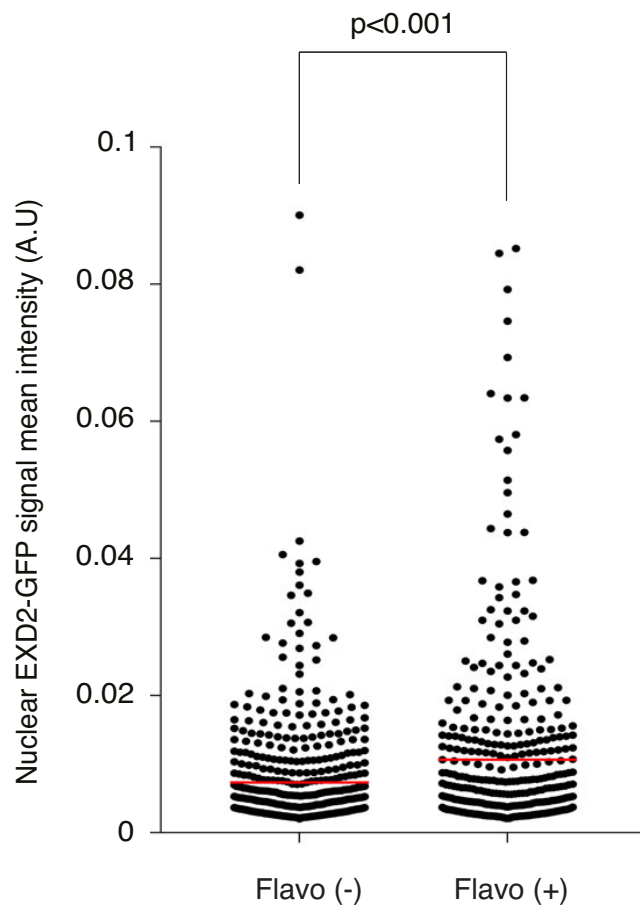

**Supplementary Figure 6: EXD2<sup>WT</sup>-GFP localization in U-2 OS cell**

**a.** Representative confocal images of U-2 OS cells stably expressing EXD2<sup>WT</sup>-GFP with or without Flavopiridol treatment. Images of the cells were obtained with the same microscopy system and constant acquisition parameters.

**b.** Quantification of the EXD2-GFP nuclear signal in U-2 OS cells treated or not with Flavopiridol (n= at least 400 cells). Red bars indicate mean integrated density. One-way ANOVA with post-hoc Tukey adjustment comparisons were used to determine the p-values. Source data are provided as a Source Data file.

**Supplementary Table 1: Reagents and chemicals**

| REAGENT or RESOURCE                                  | SOURCE                    | IDENTIFIER                  |
|------------------------------------------------------|---------------------------|-----------------------------|
| <b>Antibodies</b>                                    |                           |                             |
| ACTIN 1/1000                                         | Abcam                     | AB209856                    |
| CPD 1/500                                            | Cosmo Bio                 | CAC-NM-DND-001              |
| ATP5A 1/1000                                         | ProteinTech Europe        | 66037-1-IG                  |
| EXD2 1/2000                                          | Sigma-Aldrich             | HPA005848                   |
| FLAG M2 1/1000                                       | Sigma-Aldrich             | F1804                       |
| GAPDH 1/2000                                         | Abcam                     | AB8245                      |
| GFP 1/2000                                           | Amsbio                    | TP401                       |
| GFP (PLA)                                            | Roche                     | 11814460001                 |
| GST 1/1000                                           | Abcam                     | ab19256                     |
| $\gamma$ H2AX 1/1000                                 | Abcam                     | ab22551                     |
| Histone H3 1/5000                                    | Abcam                     | ab1791100                   |
| RPB1 1/5000                                          | Homemade IGBMC            | 7C2                         |
| RNA Pol II (PLA)                                     | Bethyl                    | A300-653A                   |
| TFIIIE $\alpha$ 1/1000                               | Homemade, IGBMC           | 2A1                         |
| Vinculin 1/1000                                      | Sigma Aldrich             | V9131                       |
| XPA 1/500                                            | SCBT                      | SC-853                      |
| 6-4PP 1/1000                                         | Cosmo Bio                 | CAC-NM-DND-002              |
| <b>Chemicals, peptides, and recombinant proteins</b> |                           |                             |
| Actinomycin D                                        | Sigma Aldrich             | A-1410                      |
| DRB                                                  | Merck Chemicals           | 287891                      |
| Et743                                                | PharmaMar                 | (Feuerhahn et al., 2011)    |
| LightCycler 480 SYBR Green I Master                  | Roche                     | 04887352001                 |
| MitoTracker Red CMXRos                               | Invitrogen                | M7512                       |
| Streptavidin magnetic beads                          | Fisher Scientific SAS     | 88816                       |
| TriReagent                                           | Molecular Research Center | TR118                       |
| Vectashield                                          | VectorLaboratories        | H-1000-10                   |
| <b>Critical commercial assays</b>                    |                           |                             |
| Click-iT EU Alexa Fluor 488 Imaging Kit              | ThermoFisher              | C10329                      |
| Click-iT EdU Alexa Fluor 488 Imaging Kit             | ThermoFisher              | C10337                      |
| Lipofectamine RNAiMAX Transfection Reagent           | Fisher Scientific SAS     | 13778030                    |
| SuperScript IV kit                                   | Invitrogen                | 18090050                    |
| X-tremeGene DNA Transfection Reagent                 | Roche                     | 063657870001                |
| <a href="#">Qproteome Mitochondria Isolation Kit</a> | <a href="#">Qiagen</a>    | <a href="#">37612</a>       |
| <b>Experimental models: Cell lines</b>               |                           |                             |
| U-2 OS and U-2 OS pTuner 263                         |                           | (Nagy et al., 2016)         |
| CS1ANSV and CS1ANSV+CSB                              |                           | (Kristensen et al., 2013)   |
| HeLa                                                 |                           | Nieminuszczy et al., 2019)  |
| HeLa EXD2 <sup>-/-</sup> -cl1 and 2                  |                           | (Nieminuszczy et al., 2019) |

|                                                                  |                        |                             |
|------------------------------------------------------------------|------------------------|-----------------------------|
| HeLa EXD2 <sup>-/-</sup> +EXD2 <sup>WT</sup> -cl1 and 2          |                        | (Nieminuszczy et al., 2019) |
| HeLa EXD2 <sup>-/-</sup> +EXD2 <sup>D108A/E110A</sup> -cl1 and 2 |                        | (Nieminuszczy et al., 2019) |
| U-2 OS <sup>GFP</sup>                                            |                        | (Nieminuszczy et al., 2019) |
| U-2 OS <sup>EXD2-GFP</sup>                                       |                        | (Nieminuszczy et al., 2019) |
| XP4PA-SV                                                         |                        | (Donnio et al., 2019)       |
| XPC HeLa Silencix                                                |                        | (Le May et al., 2010)       |
| <b>Oligonucleotides</b>                                          |                        |                             |
| F: GCAGAAGAACGGCATCAAGG                                          | <i>CFP-SKL</i>         | This paper                  |
| R: GTCCATGCCGAGAGTGATCC                                          | <i>CFP-SKL</i>         | This paper                  |
| F: CTTCCCCGATGAGA ACTTCAA ACT                                    | <i>CycB</i>            | This paper                  |
| R: CACCTCCATGCCCTCTAGA ACTTT                                     | <i>CycB</i>            | This paper                  |
| siXPF                                                            | Dharmacon              | 019946-00                   |
| siXAB2                                                           | Dharmacon              | 004914-01                   |
| siEXD2                                                           | Dharmacon              | 020899-02                   |
| siCTL                                                            | Dharmacon              | 001810-02                   |
| siXPA                                                            | Dharmacon              | 005067-01                   |
| siCSB                                                            | Dharmacon              | 004888-00                   |
| siCSA                                                            | Dharmacon              | 011008-00                   |
| siUSP33                                                          | Dharmacon              | 006081-00                   |
| siBPTF                                                           | Dharmacon              | 004025-00                   |
| siYLPM1                                                          | Dharmacon              | 032696-00                   |
| <b>Recombinant DNA</b>                                           |                        |                             |
| mCherry-LacR                                                     |                        | (Nagy et al., 2016)         |
| <b>Software and algorithms</b>                                   |                        |                             |
| GraphPad Prism                                                   | GraphPad Software Inc. |                             |
| ImageJ                                                           | NIH                    |                             |
| CellProfiler                                                     | Broad Institut         | CellProfiler                |
| <b>Other</b>                                                     |                        |                             |
| Leica DM 4000 B equipped with a CoolSnap FX monochrome camera    | Leica                  |                             |

### Supplementary References

- Donnio, L.-M., Lagarou, A., Sueur, G., Mari, P.-O., Giglia-Mari, G., 2019. CSB-Dependent Cyclin-Dependent Kinase 9 Degradation and RNA Polymerase II Phosphorylation during Transcription-Coupled Repair. *Mol Cell Biol* 39. <https://doi.org/10.1128/MCB.00225-18>
- Feuerhahn, S., Giraudon, C., Martinez-Diez, M., Bueren-Calabuig, J.A., Galmarini, C.M., Gago, F., Egly, J.M., 2011. XPF-dependent DNA breaks and RNA polymerase II arrest induced by antitumor DNA interstrand crosslinking-mimetic alkaloids. *Chem Biol* 18, 988–99. [https://doi.org/S1074-5521\(11\)00227-4](https://doi.org/S1074-5521(11)00227-4) [pii] 10.1016/j.chembiol.2011.06.007



- Kristensen, U., Epanchintsev, A., Rauschendorf, M.A., Laugel, V., Stevnsner, T., Bohr, V.A., Coin, F., Egly, J.M., 2013. Regulatory interplay of Cockayne syndrome B ATPase and stress-response gene ATF3 following genotoxic stress. *Proceedings of the National Academy of Sciences of the United States of America* 110, E2261-70. <https://doi.org/10.1073/pnas.1220071110>
- Le May, N., Mota-Fernandes, D., Velez-Cruz, R., Iltis, I., Biard, D., Egly, J.M., 2010. NER factors are recruited to active promoters and facilitate chromatin modification for transcription in the absence of exogenous genotoxic attack. *Mol Cell* 38, 54–66. [https://doi.org/S1097-2765\(10\)00211-X](https://doi.org/S1097-2765(10)00211-X) [pii] 10.1016/j.molcel.2010.03.004
- Nagy, Z., Kalousi, A., Furst, A., Koch, M., Fischer, B., Soutoglou, E., 2016. Tankyrases Promote Homologous Recombination and Check Point Activation in Response to DSBs. *PLoS Genet* 12, e1005791. <https://doi.org/10.1371/journal.pgen.1005791>
- Nieminuszczy, J., Broderick, R., Bellani, M.A., Smethurst, E., Schwab, R.A., Cherdyntseva, V., Evmorfopoulou, T., Lin, Y.-L., Minczuk, M., Pasero, P., Gagos, S., Seidman, M.M., Niedzwiedz, W., 2019. EXD2 Protects Stressed Replication Forks and Is Required for Cell Viability in the Absence of BRCA1/2. *Molecular Cell* 75, 605-619.e6. <https://doi.org/10.1016/j.molcel.2019.05.026>
- Shanbhag, N.M., Rafalska-Metcalf, I.U., Balane-Bolivar, C., Janicki, S.M., Greenberg, R.A., 2010. ATM-dependent chromatin changes silence transcription in cis to DNA double-strand breaks. *Cell* 141, 970–81. <https://doi.org/10.1016/j.cell.2010.04.038>
