# Supplementary material for: Active mRNA degradation by EXD2 nuclease elicits recovery of transcription after genotoxic stress
Source: PubMed Central journal article supplement (PMC9859823; doi:10.1038/s41467-023-35922-5), 2023-01-20
Supplement: 41467_2023_35922_MOESM2_ESM.pdf [file 41467_2023_35922_MOESM2_ESM.pdf]

## Reporting Summary

Nature Portfolio wishes to improve the reproducibility of the work that we publish. This form provides structure for consistency and transparency in reporting. For further information on Nature Portfolio policies, see our [Editorial Policies](#) and the [Editorial Policy Checklist](#).

### Statistics

For all statistical analyses, confirm that the following items are present in the figure legend, table legend, main text, or Methods section.

n/a Confirmed

- The exact sample size ( $n$ ) for each experimental group/condition, given as a discrete number and unit of measurement
- A statement on whether measurements were taken from distinct samples or whether the same sample was measured repeatedly
- The statistical test(s) used AND whether they are one- or two-sided  
*Only common tests should be described solely by name; describe more complex techniques in the Methods section.*
- A description of all covariates tested
- A description of any assumptions or corrections, such as tests of normality and adjustment for multiple comparisons
- A full description of the statistical parameters including central tendency (e.g. means) or other basic estimates (e.g. regression coefficient) AND variation (e.g. standard deviation) or associated estimates of uncertainty (e.g. confidence intervals)
- For null hypothesis testing, the test statistic (e.g.  $F$ ,  $t$ ,  $r$ ) with confidence intervals, effect sizes, degrees of freedom and  $P$  value noted  
*Give  $P$  values as exact values whenever suitable.*
- For Bayesian analysis, information on the choice of priors and Markov chain Monte Carlo settings
- For hierarchical and complex designs, identification of the appropriate level for tests and full reporting of outcomes
- Estimates of effect sizes (e.g. Cohen's  $d$ , Pearson's  $r$ ), indicating how they were calculated

*Our web collection on [statistics for biologists](#) contains articles on many of the points above.*

### Software and code

Policy information about [availability of computer code](#)

Data collection

Data analysis

For manuscripts utilizing custom algorithms or software that are central to the research but not yet described in published literature, software must be made available to editors and reviewers. We strongly encourage code deposition in a community repository (e.g. GitHub). See the Nature Portfolio [guidelines for submitting code & software](#) for further information.

### Data

Policy information about [availability of data](#)

All manuscripts must include a [data availability statement](#). This statement should provide the following information, where applicable:

- Accession codes, unique identifiers, or web links for publicly available datasets
- A description of any restrictions on data availability
- For clinical datasets or third party data, please ensure that the statement adheres to our [policy](#)

## Human research participants

Policy information about [studies involving human research participants and Sex and Gender in Research](#).

|                             |                                  |
|-----------------------------|----------------------------------|
| Reporting on sex and gender | <input type="text" value="N/A"/> |
| Population characteristics  | <input type="text" value="N/A"/> |
| Recruitment                 | <input type="text" value="N/A"/> |
| Ethics oversight            | <input type="text" value="N/A"/> |

Note that full information on the approval of the study protocol must also be provided in the manuscript.

## Field-specific reporting

Please select the one below that is the best fit for your research. If you are not sure, read the appropriate sections before making your selection.

Life sciences       Behavioural & social sciences       Ecological, evolutionary & environmental sciences

For a reference copy of the document with all sections, see [nature.com/documents/nr-reporting-summary-flat.pdf](https://www.nature.com/documents/nr-reporting-summary-flat.pdf)

## Life sciences study design

All studies must disclose on these points even when the disclosure is negative.

|                 |                                                                                                                                      |
|-----------------|--------------------------------------------------------------------------------------------------------------------------------------|
| Sample size     | <input type="text" value="sample size is indicated for each experiment and was chosen to calculate statistical significant"/>        |
| Data exclusions | <input type="text" value="no data exclusion"/>                                                                                       |
| Replication     | <input type="text" value="replication is indicated, biological triplicates or technical triplicates, all attempts were successful"/> |
| Randomization   | <input type="text" value="N/A no animal was used in this paper and therefore no randomization was necessary"/>                       |
| Blinding        | <input type="text" value="N/A no animal was used in this paper and therefore no blinding was necessary"/>                            |

## Reporting for specific materials, systems and methods

We require information from authors about some types of materials, experimental systems and methods used in many studies. Here, indicate whether each material, system or method listed is relevant to your study. If you are not sure if a list item applies to your research, read the appropriate section before selecting a response.

### Materials & experimental systems

| n/a                                 | Involved in the study                                     |
|-------------------------------------|-----------------------------------------------------------|
| <input type="checkbox"/>            | <input checked="" type="checkbox"/> Antibodies            |
| <input type="checkbox"/>            | <input checked="" type="checkbox"/> Eukaryotic cell lines |
| <input type="checkbox"/>            | <input type="checkbox"/> Palaeontology and archaeology    |
| <input checked="" type="checkbox"/> | <input type="checkbox"/> Animals and other organisms      |
| <input checked="" type="checkbox"/> | <input type="checkbox"/> Clinical data                    |
| <input checked="" type="checkbox"/> | <input type="checkbox"/> Dual use research of concern     |

### Methods

| n/a                                 | Involved in the study                           |
|-------------------------------------|-------------------------------------------------|
| <input checked="" type="checkbox"/> | <input type="checkbox"/> ChIP-seq               |
| <input checked="" type="checkbox"/> | <input type="checkbox"/> Flow cytometry         |
| <input checked="" type="checkbox"/> | <input type="checkbox"/> MRI-based neuroimaging |

## Antibodies

|                 |                                                                                                                                                                                                                                                                                                                                                                                                                                                                                                                                                                      |
|-----------------|----------------------------------------------------------------------------------------------------------------------------------------------------------------------------------------------------------------------------------------------------------------------------------------------------------------------------------------------------------------------------------------------------------------------------------------------------------------------------------------------------------------------------------------------------------------------|
| Antibodies used | <input type="text" value="all antibodies used are described in Supplemental Table 1"/>                                                                                                                                                                                                                                                                                                                                                                                                                                                                               |
| Validation      | <input gapdh-antibody-6c5-loading-control-ab8245.html"="" https:="" type="text" value="Anti-Actin mouse monoclonal, Abcam ab 8245&lt;br/&gt; &lt;a href=" www.abcam.com=""/> https://www.abcam.com/gapdh-antibody-6c5-loading-control-ab8245.html<br>Validated by the company and following publication : Wang, H., et al., Cell Death Diff 13 :435 (2022)<br><br>Anti-CPD mouse monoclonal, Cosmo Bio CAC-NM-DND-001<br><a href="https://www.cosmobiousa.com/products/anti-cpds-mab-clone-tdm-2">https://www.cosmobiousa.com/products/anti-cpds-mab-clone-tdm-2</a> |

Validated by the company and following publication : Mori, T., et al., Photochem. Photobiol. 54, 225-232 (1991)

Anti-ATP5A mouse monoclonal, Proteintech 66037-1

<https://www.ptglab.com/products/ATP5A1-Antibody-66037-1-ig.htm>

Validated by the company and following publication : Lu, Y.T., et al., Cell Death Dis, 9(6) :672 (2018)

Anti-EXD2 rabbit polyclonal, SIGMA, HPA00548

<https://www.sigmaaldrich.com/FR/fr/product/sigma/hpa005848>

Validated by the company and following publication : Biehs, R., et al., Molecular Cell, 65(4) :671-684 (2017)

Anti-Flag M2 mouse monoclonal, SIGMA, F1804

[https://www.sigmaaldrich.com/FR/fr/product/sigma/f1804?gclid=aw.ds&gclid=EAlalQobChMiv\\_mRn8-F\\_AIVkc3VCh0Y0wN1EAAYASAAEglijvD\\_BwE](https://www.sigmaaldrich.com/FR/fr/product/sigma/f1804?gclid=aw.ds&gclid=EAlalQobChMiv_mRn8-F_AIVkc3VCh0Y0wN1EAAYASAAEglijvD_BwE)

Validated by the company and following publication : Srivastava, M., et al., Nature Communications, 6, 6253 (2015)

Anti-GAPDH mouse monoclonal, Abcam ab 8245

<https://www.abcam.com/gapdh-antibody-6c5-loading-control-ab8245.html>

Validated by the company and following publication : Wang, H., et al., Cell Death Diff 13 :435 (2022)

Anti-GFP rabbit polyclonal, Amsbio TP401

<https://www.amsbio.com/rabbit-anti-gfp-pab-tp401>

Validated by the company and following publication : Kosar, M., et al., Nature Communications, 12, 3937 (2021)

Anti-GFP mouse monoclonal, Roche 11814460001

[https://www.sigmaaldrich.com/FR/fr/product/roche/11814460001?gclid=aw.ds&gclid=EAlalQobChMitNGEgNuF\\_AIVh6ztCh1uaQJjEAAYASAAEgLvD\\_BwE](https://www.sigmaaldrich.com/FR/fr/product/roche/11814460001?gclid=aw.ds&gclid=EAlalQobChMitNGEgNuF_AIVh6ztCh1uaQJjEAAYASAAEgLvD_BwE)

Validated by the company and following publication : Chalfie, M., Science, 263, 802-805 (1994)

Anti-GST rabbit monoclonal, Abcam ab19256

<https://www.abcam.com/gst-antibody-ab19256.html> Validated by the company and following publication : Joset, A., J Cell Biol 188 :271-85 (2010).

Anti-gH2AX mouse monoclonal, Abcam ab22551

<https://www.abcam.com/gamma-h2ax-phospho-s139-antibody-3f2-ab22551.html>

Validated by the company and following publication : Ochs, F., Nature 574 :571-574 (2019)

Anti-Histone H3 rabbit polyclonal, Abcam ab1791

<https://www.abcam.com/histone-h3-antibody-nuclear-marker-and-chip-grade-ab1791.html>

Validated by the company and following publication : Yuan, L., NAR, 49 :98-113 (2021)

Anti-RPB1 mouse monoclonal, 7C2 IGBMC Home made

Validated following publication : Boulon, S., Mol Cell, 39(6) : 912-924

Anti-RPB1 rabbit polyclonal, Bethyl A300-653A

<https://www.fortislife.com/products/primary-antibodies/rabbit-anti-rna-polymerase-ii-antibody/BETHYL-A300-653#dummy-cit>

Validated following publication : Sharifnia, W., Nat Med 292-300 (2019)

Anti-TFIIa mouse monoclonal, 2A1 IGBMC Home made

Validated following publication : Compe, E., Nature Communications, 10 :2084 (2019)

Anti-Vinculin mouse monoclonal, Sigma V9131

<https://www.sigmaaldrich.com/FR/fr/sds/sigma/v9131>

Validated following publication : Berico, P., Embo Rep, 22(9) 51683

Anti-XPA rabbit polyclonal, SCBT sc-853

<https://www.scbt.com/fr/p/xpa-antibody-fl-273?requestFrom=search>

Validated following publication : Fischer, J.M., The FEBS journal, 281 : 3625-41

Anti-(6-4PPs) mouse monoclonal, Clone 64M-2

<https://www.cosmobioussa.com/products/anti-6-4pps-mab-clone-64m-2>

Validated following publication : Yamamoto, A., et al., DNA Repair, 6, 649-657 (2007).

## Eukaryotic cell lines

Policy information about [cell lines and Sex and Gender in Research](#)

Cell line source(s)

U-2 OS, HeLa, CS1ANSV, CS1ANSV+CSB

Authentication

no authentication

Mycoplasma contamination

no contamination certified by our cell culture departement

Commonly misidentified lines  
(See [ICLAC](#) register)

no commonly misidentified lines used in this work

## Palaeontology and Archaeology

---

Specimen provenance

*Provide provenance information for specimens and describe permits that were obtained for the work (including the name of the issuing authority, the date of issue, and any identifying information). Permits should encompass collection and, where applicable, export.*

Specimen deposition

*Indicate where the specimens have been deposited to permit free access by other researchers.*

Dating methods

*If new dates are provided, describe how they were obtained (e.g. collection, storage, sample pretreatment and measurement), where they were obtained (i.e. lab name), the calibration program and the protocol for quality assurance OR state that no new dates are provided.*

Tick this box to confirm that the raw and calibrated dates are available in the paper or in Supplementary Information.

Ethics oversight

*Identify the organization(s) that approved or provided guidance on the study protocol, OR state that no ethical approval or guidance was required and explain why not.*

Note that full information on the approval of the study protocol must also be provided in the manuscript.
